# Supplementary material
Source: publisher site journal article supplement (https://www.dovepress.com/article/464289)
Supplement: Supplementary file 1 [file get_supplementary_file.php]

**ID 464289: Physicians’ perceptions and experiences regarding leadership: a link between beliefs and identity formation**

# **Supplementary material**

[Supplementary material 1](#_Toc167773534)

[Appendix 1 – Focus Group Inform and Consent Form 2](#_Toc167773535)

[Appendix 2 - Focus group interview guide on leadership skills 5](#_Toc167773536)

## Appendix 1 – Focus Group Inform and Consent Form

**Participant Information Form**

Concerns: "**Leadership/Management - Training Needs Assessment**" project

Dear participant,

You are invited to participate in a study conducted by the Institute of Primary Care Medicine and the Medical Education Development and Research Unit under the direction of Dr. N. Junod Perron.

The purpose of this study is to evaluate the training needs of interns/clinical directors and assistant physicians at the HUG in the area of leadership/management. The study is part of the development of training activities considered useful for physicians in their various roles within health institutions.

The results of this research will help improve existing leadership/management trainings or develop new ones by taking into account the needs and perceptions of the participants, their reality in the field and the recommended conceptual frameworks in the field.

Your participation consists of an individual or group interview. You are free to accept or refuse to participate in the project. You can change your mind at any time and withdraw from the project without having to justify your decision.

For the purposes of the study, and subject to your consent, interviews will be recorded. Data collected for research purposes will be coded at the time of collection. All written data that could identify you will be replaced with a code. Recorded data will be saved on an external disk that will be placed in a locked cabinet in the principal investigator's office. Audio recordings will be destroyed 2 years after the end of the study. Transcribed data will be kept for 10 years.

The analysed results may be used in scientific publications. Confidentiality of the data will be ensured, and your name or any information that could identify you will not appear anywhere. All persons involved in the study are bound by professional secrecy.

You can contact the principal investigators of the study at any time for further information:

- Dr. Noëlle Junod, Unit of Developement and Research in Medical Education (UDREM) and the Primary Care Institut (IMPR), HUG, Noelle.Junod@hcuge.ch.
- Mr. Robin Lüchinger, PhD student, UDREM, Robin.Luechinger@unige.ch

**Participant Consent Form**

Concerns: "**Leadership/Management - Training Needs Assessment**" project

If you wish to participate in this research, we thank you for completing the following consent form. We remind you that you may withdraw from the study at any time without justification, compensation or consequence. The data collected at your departure will be kept and analysed.

If after reading the document below, you wish to have additional information, please do not hesitate to contact the persons mentioned as contact.

- I declare that I have been informed orally and in writing by the undersigned information officer of the objectives and progress of the project as well as the presumed effects, advantages, possible disadvantages and possible risks.
- I am participating in this study voluntarily and I accept the contents of the information sheet that has been given to me about the above-mentioned project. I have had sufficient time to make my decision.
- I have received satisfactory answers to the questions I have asked in connection with my participation in the project.
- I agree that the competent specialists of the institution, of the project leader, may consult my raw data in order to carry out controls, provided that the confidentiality of these data is strictly assured.
- I am aware that my personal data may be transmitted for research purposes within the framework of this project only and in an encrypted form.
- I can revoke my consent to participate in the study at any time without having to justify myself, without this having any negative repercussions on the continuation of my studies.

**Data protection**

- The recorded data will be saved on an external disk that will be placed in a locked cabinet in the principal investigator's office.
- All persons involved in the study are bound by confidentiality.
- The data collected is coded at the time of collection. Coding means that anything that identifies you (e.g. name, address, phone number, email address etc.) is replaced by a code.
- The code remains permanently within the UDREM. If data is to be passed on to other institutions, it is always coded
- The study may be subject to on-site inspections by the authorizing ethics commission. The physician-investigator may be required to release your personal and medical data for the purpose of these inspections. The members of the ethics commission are subject to professional secrecy.
- Your identity will never appear on the Internet or in any publication.

**Certification of Information Providers:**

We hereby certify that we have explained to the participant the nature, importance and scope of this research. We hereby declare that we have fulfilled all obligations in connection with this research in accordance with the applicable law. Should we become aware, at any time during the course of the project, of elements that could affect the participant's consent to participate in the project; we undertake to inform him/her immediately.

| Study title | "**Leadership/Management - Training Needs Assessment**" |
| --- | --- |
| Responsible institutions | IMPR (HUG)  UDREM (Unige) |
| Project location | French speaking part of Switzerland - Geneva |
| Contact | Dre Noëlle Junod Perron, UDREM/UNIGE and IMPR/HUG, [Noelle.Junod@hcuge.ch](mailto:Noelle.Junod@hcuge.ch)  M. Robin Lüchinger, PhD Student UDREM/UNIGE, [Robin.Luechinger@unige.ch](mailto:Robin.Luechinger@unige.ch) |

Having read the terms of the above document, I give my consent to participate in the "Leadership/Management Training Needs Assessment" study.

**□ Yes □ No**

First and Last Name: _____________________

Location, date: _______________________

## Appendix 2 - Focus group interview guide on leadership skills

**Objectives**

- How they see their role as manager/leader
- What are their training needs (examples to fuel the trainings)
- What are the barriers/incentives to training

Conceptual framework: culture (explicit and implicit norms) implicit norms), social psychology, Crosier (individuals act according to the norms of an organization/system), task- or relationship-centered management

**Procedure**

1. Welcome
2. Presentation of the moderators and their role
3. Project overview
   - Survey: Get a better sense of how physicians perceive their leadership/management skills and their training needs
   - Focus groups : explore your leadership/management experiences, the challenges you faced in your work context and what helped you overcome those challenges
   - Programme :
     - Session duration: 1h30
     - Brainstorming / idea generation
4. Participants’ presentation
5. Reminder of the rules of the discussion group
   1. Do not interrupt
   2. Allow the others to speak (do not dominate the discussion)
   3. Respect the ideas and opinions of others
   4. Everything is interesting
6. Summary and debriefing

**Guide for residents, fellows and attending physicians**

1. If you are told: management and leadership skills in medicine, what does that mean to you?
2. How is it going in terms of management/leadership in your department?
   1. What examples do you have of good practices?
   2. What examples do you have of less good practices?
   3. How would you describe the management culture in your department?
3. What difficulties do you encounter as a [physicians’ role] in terms of management and leadership in your work?
4. What helps/has helped you to develop management and leadership skills?
   1. If training not mentioned - ask why (barriers) and what would be needed (incentives)
   2. If training mentioned - explore benefits/disadvantages/wants
5. What would help you to better master these management and leadership skills?

**Guide for chairpersons**

1. If you are told: management and leadership skills in medicine, what does that mean to you?
2. How is it going in terms of management/leadership in your department?
   1. What examples do you have of good practices?
   2. What examples do you have of less good practices?
   3. How would you describe the management culture in your department?
3. What helps/has helped you develop management and leadership skills?
   1. If training not mentioned - ask why (barriers) and what would be needed (incentives)
   2. If training mentioned - explore benefits/disadvantages/wants
4. In terms of management/leadership, what do you expect from
   1. Your residents
   2. Your fellows
   3. Your attending physicians
5. What leadership/management challenges do you see in them?
   1. Your residents
   2. Your fellows
   3. Your attending physicians
6. What would help them better master these management and leadership skills?
